# Supplementary material
Source: PubMed Central journal article supplement (PMC5740280)
Supplement: rspb20171824supp1.pdf [file rspb20171824supp1.pdf]

1 **Figure S1. Testing for linkage disequilibrium between the 20 microsatellite loci.**

2 There was no linkage disequilibrium among the 20 microsatellite markers.

3

4

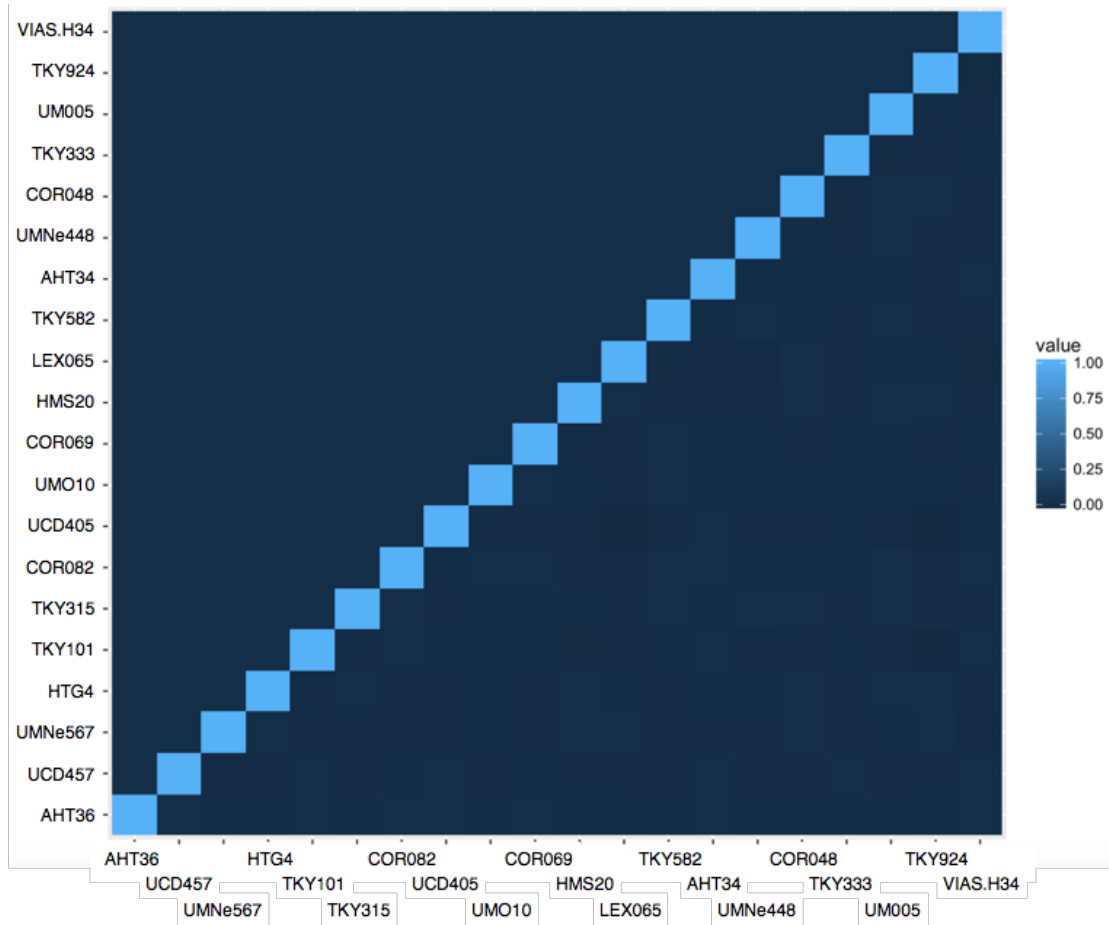

5
