# Supplementary material
Source: PubMed Central journal article supplement (PMC5740280)
Supplement: rspb20171824supp2.pdf [file rspb20171824supp2.pdf]

**Table S1. The 20 microsatellite markers used to determine overall genetic similarity**

The name of the markers, their chromosomal location, their primer sequences [1], the annealing temperature, the fluorophores we used, the number of alleles found in the present sample (N = 148), and the number of alleles previously observed in 311 world-wide distributed Hanoverian warmblood horses.

| Name<br>(chromosome) | Primer sequence (5'- 3')                           | Annealing<br>temperature | Fluorophore | Number of<br>alleles in<br>present study | Number of alleles in<br>Mittmann <i>et al.</i> [1] |
|----------------------|----------------------------------------------------|--------------------------|-------------|------------------------------------------|----------------------------------------------------|
| VIAS-H34 (1)         | GCTTTTGTTTCTCAATCCTAGC<br>TGAAGTCAAATCCCTGCTTC     | 58°C                     | HEX         | 11                                       | 7                                                  |
| UMNe448 (2)          | CCATTCTGCCCTGATTGG<br>TTCAAGACCCCTCAATCTGC         | 55°C                     | FAM         | 6                                        | 6                                                  |
| AHT36 (3)            | TGCTGCTCCAGTGTCTT<br>TAGATTTACAGGCGGGTG            | 60°C                     | AT550       | 9                                        | 8                                                  |
| UMNe567 (5)          | GGTGCAGCTGCTAGCTCAG<br>AGACCCAGTCATTGGGAGG         | 60°C                     | FAM         | 6                                        | 4                                                  |
| LEX065 (6)           | GAAGGCACAATTCAATCTACT<br>GCCAGTCCCATTCTAAC         | 60°C                     | ATTO550     | 6                                        | 5                                                  |
| HTG4 (9)             | CTATCTCAGTCTTCATTGCAGGAC<br>CTCCCTCCCTCCCTCTGTTCTC | 55°C                     | AT550       | 6                                        | 6                                                  |

|             |                                                |      |         |    |    |
|-------------|------------------------------------------------|------|---------|----|----|
| COR048 (10) | GATTGGGATGCAAAGATGAG<br>CAAGAGGATTGGGAACAAAGG  | 58°C | FAM     | 8  | 6  |
| UCD457 (11) | GGGGCGTGAGCATAAAGG<br>CGCTGGATGAGTGAGGGA       | 60°C | FAM     | 12 | 10 |
| COR069 (13) | AGGCAGCTTGACTACCCTGA<br>AAAGTCTCCCCTGCGTGTT    | 58°C | ATTO550 | 8  | 7  |
| UM010 (14)  | TACAGCCATTGGAAATCTAC<br>CACCATTACATTTTCCCAG    | 55°C | FAM     | 7  | 7  |
| HMS20 (16)  | TGAGTGTTTGCGTGTGTGTG<br>TCCCGTCTCCTCTCTTGTC    | 58°C | FAM     | 6  | 5  |
| TKY924 (17) | TTCACCTATGAGTTTGAGGTA<br>CGTCATAATGCAGACTCTTTG | 55°C | HEX     | 5  | 4  |
| TKY101 (18) | TCTGAAATACCGTGTGCCT<br>TTCTGCCTCCCTCCAAC TTT   | 55°C | FAM     | 9  | 8  |
| TKY582 (22) | AGCCACCAGTCTGTTCTCTG<br>AATGTCCTTTGGTGGATGAAC  | 58°C | HEX     | 6  | 7  |
| UCD405 (25) | ACCTCGTCTGGCTGTTGTAAG<br>ACTTGCTGTGCGACTCTG    | 60°C | HEX     | 9  | 9  |

|             |                                                       |      |         |    |   |
|-------------|-------------------------------------------------------|------|---------|----|---|
| UM005 (26)  | CCCTACCTGAAATGAGAATTG<br>GGCAAAAGATCAGGCCAT           | 55°C | HEX     | 7  | 7 |
| TKY315 (27) | GATGCCTCGAACTAGCTTG<br>GATCTTCCATGTTTTGTTGG           | 55°C | FAM     | 8  | 8 |
| TKY333 (28) | CCTTCACTAGCCTTCAAATG<br>TTGTGTTTAGACAGTGCTGC          | 55°C | FAM     | 11 | 8 |
| COR082 (29) | TGGGAGAGGTACCTGAAATGTAC<br>GTTGCTATAAAAAATTGTCTCCCTAC | 55°C | ATTO550 | 9  | 7 |
| AHT34 (31)  | CTCAGGGCGAATGTTCTC<br>CCCCACCATGAGTCAAAAAC            | 60°C | FAM     | 9  | 7 |

---

## Reference

1. Mittmann E.H., Lampe V., Mömke S., Zeitz A., Distl O. 2010 Characterization of a minimal microsatellite set for whole genome scans informative in warmblood and coldblood horse breeds. *J. Hered.* **101**(2), 246–250. (doi:10.1093/jhered/esp091).
