# Supplementary material
Source: PubMed Central journal article supplement (PMC5740280)
Supplement: rspb20171824supp3.pdf [file rspb20171824supp3.pdf]

**Table S2. Effects of genetic similarity on female fertility (pregnant yes/no), restricting the analyses to only warmblood mares (N=173).** Likelihood ratio tests comparing GLMMs and GLMs with genetic markers (fixed factors) and/or stallion identity (“ID”, random factor) and reference models (indicated in italics) to test the effects of **(A)** MHC antigen sharing (“MHC”, yes/no), and **(B)** pairwise genetic relatedness “r” based on 20 polymorphic microsatellite loci. **(C)** Direct comparison of effects of MHC and r in the subsample of 113 mares that allow for such a test. Significant p-values are emphasized in bold.

| Model                                               | Effect tested     | d.f. | logL   | $\chi^2$ | P                 |
|-----------------------------------------------------|-------------------|------|--------|----------|-------------------|
| <b>(A) MHC effects (173 mares)</b>                  |                   |      |        |          |                   |
| <i>MHC + ID</i>                                     |                   | 3    | -113.8 |          |                   |
| ID                                                  | MHC sharing       | 2    | -115.5 | 3.3      | 0.07 <sup>1</sup> |
| MHC                                                 | Stallion ID       | 2    | -113.9 | 0.02     | 0.90              |
| MHC + ID + ID x MHC                                 | Stallion ID x MHC | 4    | -133.7 | 0.3      | 0.58              |
| <b>(B) Diversity on microsatellites (113 mares)</b> |                   |      |        |          |                   |
| <i>r + ID</i>                                       |                   | 3    | -75.0  |          |                   |
| ID                                                  | r                 | 2    | -75.1  | 0.24     | 0.63              |
| r                                                   | Stallion ID       | 2    | -75.0  | 0        | 1.0               |
| r + ID + ID x r                                     | Stallion ID x r   | 4    | -75.0  | 0        | 1.0               |
| <b>(C) MHC vs microsatellites (113 mares)</b>       |                   |      |        |          |                   |
| <i>MHC + r + ID</i>                                 |                   | 4    | -70.4  |          |                   |
| r + ID                                              | MHC sharing       | 3    | -75.0  | 9.1      | <b>0.003</b>      |
| MHC + ID                                            | r                 | 3    | -70.7  | 0.6      | 0.44              |
| MHC + r                                             | Stallion ID       | 3    | -70.4  | 0        | 1                 |

<sup>1</sup> p = 0.04 if tested directed (Rice and Gaines 1994 *PNAS*. **91**, 225-226) based on the *a priori* expectancy that MHC-dissimilar stallions are more attractive than MHC-similar stallions
