# Supplementary material
Source: PubMed Central journal article supplement (PMC5740280)
Supplement: rspb20171824supp4.pdf [file rspb20171824supp4.pdf]

**Table S3. Diversity of the 20 microsatellite loci.**

Observed ( $H_{\text{obs}}$ ) and expected ( $H_{\text{exp}}$ ) heterozygosity, test for deviation from Hardy-Weinberg equilibrium ( $\chi^2$ , d.f., p), heterozygosity deficiency coefficient ( $F_{\text{is}}$ ), and differentiation between Warmblood and Franches-Montagnes horses ( $F_{\text{st}}$ ).

| Name     | $H_{\text{obs}}$ | $H_{\text{exp}}$ | $\chi^2$ | d.f. | p       | $F_{\text{is}}$ | $F_{\text{st}}$ |
|----------|------------------|------------------|----------|------|---------|-----------------|-----------------|
| AHT36    | 0.749            | 0.770            | 179.7    | 45   | <0.001* | 0.047           | 0.044           |
| UCD457   | 0.682            | 0.740            | 220.2    | 78   | 0.014   | 0.097           | 0.074           |
| UMNe567  | 0.538            | 0.657            | 49.1     | 15   | <0.001* | 0.181           | 0.009           |
| HTG4     | 0.610            | 0.651            | 158.3    | 21   | 0.135   | -0.027          | 0.099           |
| TKY101   | 0.528            | 0.696            | 200.4    | 45   | <0.001* | 0.212           | 0.001           |
| TKY315   | 0.585            | 0.641            | 26.1     | 28   | 0.107   | 0.104           | 0.051           |
| COR082   | 0.728            | 0.769            | 181.3    | 45   | 0.086   | 0.008           | 0.071           |
| UCD405   | 0.677            | 0.739            | 57.5     | 36   | 0.084   | 0.088           | 0.055           |
| UMO10    | 0.790            | 0.755            | 22.3     | 21   | 0.291   | -0.076          | 0.009           |
| COR069   | 0.703            | 0.743            | 84.1     | 28   | <0.001* | 0.030           | 0.086           |
| HMS20    | 0.631            | 0.679            | 163.5    | 15   | 0.002*  | -0.016          | 0.263           |
| LEX065   | 0.713            | 0.675            | 7.4      | 15   | 0.947   | -0.051          | 0.008           |
| TKY582   | 0.641            | 0.772            | 172.2    | 21   | <0.001* | 0.127           | 0.229           |
| AHT34    | 0.790            | 0.804            | 63.1     | 36   | 0.049   | 0.007           | 0.116           |
| UMNe448  | 0.672            | 0.743            | 24.5     | 15   | 0.015   | 0.155           | 0.023           |
| COR048   | 0.641            | 0.690            | 18.4     | 28   | 0.218   | 0.098           | 0.115           |
| TKY333   | 0.779            | 0.830            | 72.9     | 55   | 0.289   | 0.035           | 0.055           |
| UM005    | 0.697            | 0.772            | 177.6    | 21   | 0.002*  | 0.098           | 0.120           |
| TKY924   | 0.764            | 0.731            | 6.4      | 10   | 0.693   | -0.060          | 0.054           |
| VIAS.H34 | 0.379            | 0.732            | 688.1    | 55   | <0.001* | 0.499           | 0.027           |

\*significant after Holm-Bonferroni correction
