# Supplementary material
Source: PubMed Central journal article supplement (PMC5740280)
Supplement: rspb20171824supp5.pdf [file rspb20171824supp5.pdf]

**Table S4. Effects of genetic similarity on female fertility (pregnant yes/no) based on numbers of shared MHC antigens instead of the dichotomous sharing/no sharing.** Likelihood ratio tests comparing GLMMs and GLMs with genetic markers (fixed factors) and/or stallion identity (“ID”, random factor) and reference models (indicated in italics) to test the effects of **(A)** number of shared MHC antigens (“MHC”, range 0 to 3), and **(B)** direct comparison of effects of number of shared MHC antigens and pairwise relatedness *r* in the subsample of 126 mares that allow for such a test. Significant p-values are emphasized in bold.

| Model                                         | Effect tested     | d.f. | logL   | $\chi^2$ | P            |
|-----------------------------------------------|-------------------|------|--------|----------|--------------|
| <b>(A) MHC effects (191 mares)</b>            |                   |      |        |          |              |
| <i>MHC + ID</i>                               |                   | 3    | -127.6 |          |              |
| ID                                            | MHC sharing       | 2    | -129.2 | 3.2      | 0.07         |
| MHC                                           | Stallion ID       | 2    | -127.6 | 0.1      | 0.80         |
| MHC + ID + IDxMHC                             | Stallion ID x MHC | 4    | -127.6 | 0.1      | 0.81         |
| <b>(B) MHC vs microsatellites (126 mares)</b> |                   |      |        |          |              |
| <i>MHC + r + ID</i>                           |                   | 4    | -80.0  |          |              |
| r + ID                                        | MHC sharing       | 3    | -85.5  | 10.9     | <b>0.001</b> |
| MHC + ID                                      | <i>r</i>          | 3    | -80.1  | 0.03     | 0.86         |
| MHC + r                                       | Stallion ID       | 3    | -80.0  | 0        | 1.0          |
