# Supplementary material
Source: PubMed Central journal article supplement (PMC5740280)
Supplement: rspb20171824supp6.pdf [file rspb20171824supp6.pdf]

**Table S5. Effects of genetic similarity on female fertility (pregnant yes/no), based on numbers of shared MHC antigens instead of the dichotomous sharing/no sharing and restricting the analyses to only warmblood mares (N=173).**

Likelihood ratio tests comparing GLMMs and GLMs with genetic markers (fixed factors) and/or stallion identity (“ID”, random factor) and reference models (indicated in italics) to test the effects of **(A)** number of shared MHC antigens (“MHC”, range 0 to 3), and **(B)** the effects of the number of shared MHC antigens and r in the subsample of 113 mares that allow for a direct comparison. Significant p-values are emphasized in bold.

| Model                                         | Effect tested     | d.f. | logL   | $\chi^2$ | P            |
|-----------------------------------------------|-------------------|------|--------|----------|--------------|
| <b>(A) MHC effects (173 mares)</b>            |                   |      |        |          |              |
| <i>MHC + ID</i>                               |                   | 3    | -114.7 |          |              |
| ID                                            | MHC sharing       | 2    | -115.5 | 1.6      | 0.20         |
| MHC                                           | Stallion ID       | 2    | -114.7 | 0        | 1.0          |
| MHC + ID + ID x MHC                           | Stallion ID x MHC | 4    | -114.6 | 0.1      | 0.78         |
| <b>(B) MHC vs microsatellites (113 mares)</b> |                   |      |        |          |              |
| <i>MHC + r + ID</i>                           |                   | 4    | -70.6  |          |              |
| r + ID                                        | MHC sharing       | 3    | -75.0  | 8.8      | <b>0.003</b> |
| MHC + ID                                      | r                 | 3    | -71.0  | 0.9      | 0.35         |
| MHC + r                                       | Stallion ID       | 3    | -70.6  | 0        | 1            |
